# Supplementary material for: Casein Kinase 1 Phosphomimetic Mutations Negatively Impact Connexin-43 Gap Junctions in Human Pluripotent Stem Cell-Derived Cardiomyocytes
Source: MDPI journal article supplement (doi:10.3390/biom14010061), 2024-01-02
Supplement: s1 [file s1]

## Supplemental information

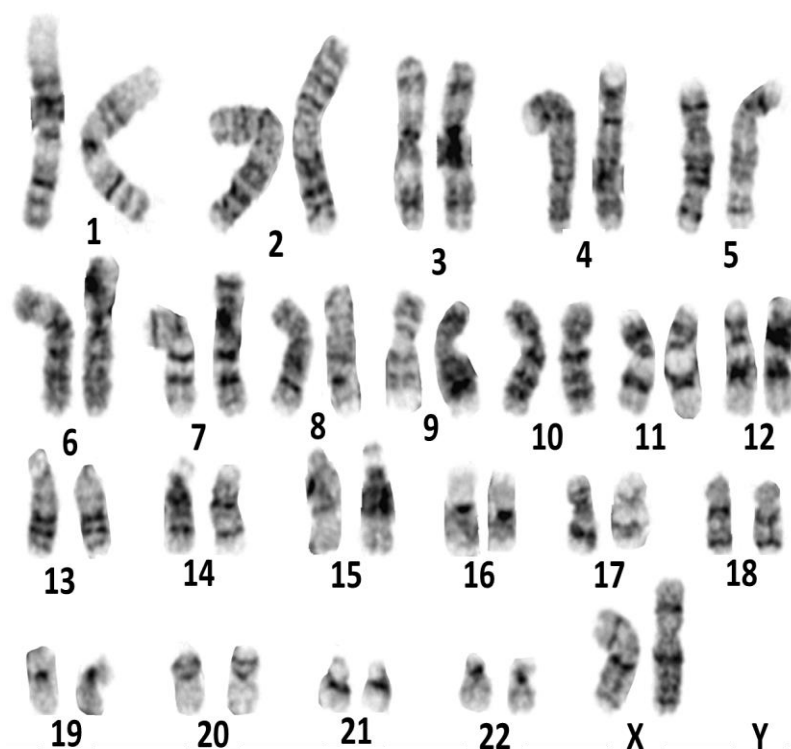

**Supplemental Figure S1. Cx43-S3E hPSCs karyotype.** G-banded karyotype of Cx43-S3E hPSCs demonstrating a normal (46, XX) karyotype.

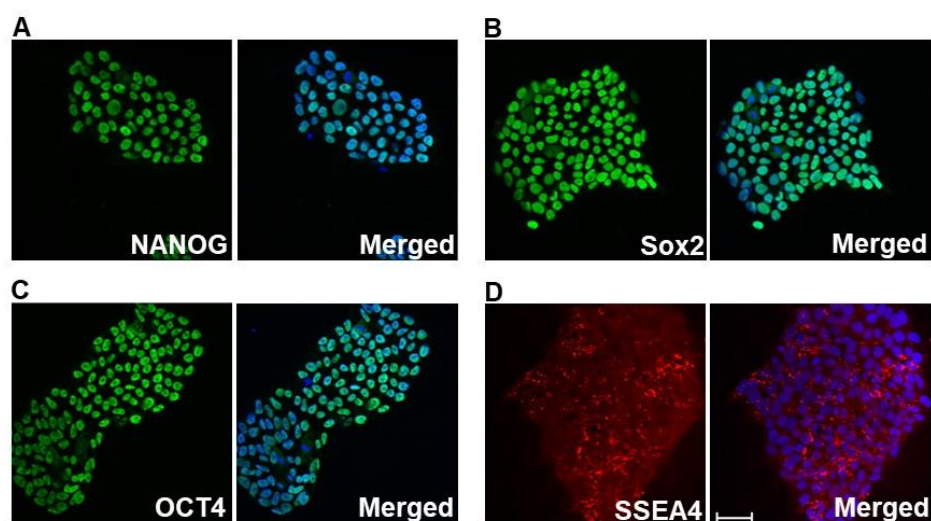

**Supplemental Figure S2 Cx43-S3E hPSCs express expected markers of pluripotency.** Representative confocal photomicrographs of undifferentiated Cx43-S3E hPSCs confirming strong expression of pluripotency markers NANOG (A), SOX2 (B), OCT4 (C), and SSEA4 (D).

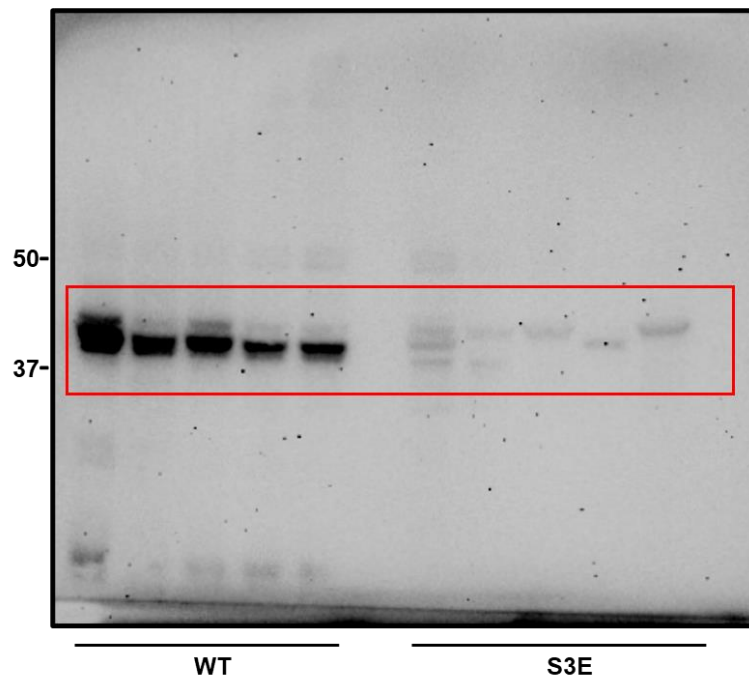

**Supplemental Figure S3. Full length blot detecting total Cx43 protein.** Molecular ladders are depicted to the left.

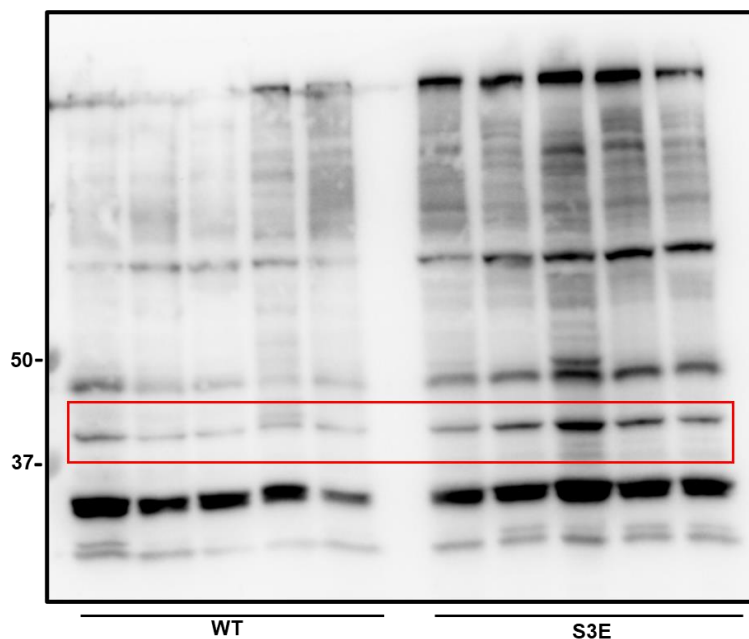

**Supplemental Figure S4. Full length blot detecting pCx43 (pS279/282) protein.** Molecular ladders are depicted to the left.

**Supplemental Video S1. Spontaneous beating of compact hPSC-CM monolayers.** Representative videos of WT (A) and Cx43-S3E (B) hPSC-CMs at 20 days post differentiation.

**Supplemental Table 1: Primary antibodies employed.**

| Antigen | Antibody type                 | Titre | Vendor         |
|---------|-------------------------------|-------|----------------|
| CD56    | Mouse Monoclonal (Cat#555518) | 1:100 | BD Biosciences |

|                                               |                                             |       |                           |
|-----------------------------------------------|---------------------------------------------|-------|---------------------------|
| <b>CD140a</b>                                 | Mouse Monoclonal (Cat# 556002)              | 1:100 | BD Biosciences            |
| <b>Myosin light chain-2v (MLC2v)</b>          | Monoclonal human recombinant (clone REA401) | 1:100 | Miltenyi Biotec           |
| <b>Cardiac troponin T (cTnT)</b>              | Monoclonal human recombinant (clone REA400) | 1:100 | Miltenyi Biotec           |
| <b>Connexin-43 (Cx43)</b>                     | Rabbit polyclonal (Cat # ab11370)           | 1:800 | Abcam                     |
| <b>Sarcomeric <math>\alpha</math>-actinin</b> | Mouse monoclonal (clone EA-53)              | 1:500 | Sigma                     |
| <b>SSEA4</b>                                  | Mouse monoclonal (Cat#4755)                 | 1:500 | Cell Signaling Technology |
| <b>Sox2</b>                                   | Rabbit monoclonal (Cat#3579)                | 1:400 | Cell Signaling Technology |
| <b>OCT4</b>                                   | Rabbit monoclonal (Cat#2840)                | 1:200 | Cell Signaling Technology |
| <b>NANOG</b>                                  | Rabbit monoclonal (Cat#4903)                | 1:200 | Cell Signaling Technology |

**Supplemental Table 2: List of primers used.**

| <b>Target</b>  | <b>Forward</b>           | <b>Reverse</b>           |
|----------------|--------------------------|--------------------------|
| <b>Cx30</b>    | CGTACACCAGCAGCATCTT      | CGTCTGTGCTCTCTTTGATCTC   |
| <b>Cx40</b>    | AGAGTGTGAAGAAGCCACG      | AACAGATGCCAAAACCTTCTGCT  |
| <b>Cx40.1</b>  | AGCGAAAAGCTGGGCAGAC      | TCACACCCACTCAGACTTCCT    |
| <b>Cx43</b>    | GGTGACTGGAGCGCCTTAG      | GCGCACATGAGAGATTGGGA     |
| <b>Cx45</b>    | GTCCACCCGTTTTATGTGTGC    | AGTGAGTCTCGAATGGTCCCA    |
| <b>Cx58</b>    | GAAATGCCTAGGGATCGGA      | AACCTAGGTGGAAAATTTCAAGA  |
| <b>Cx62</b>    | AAGGATGTCTGCTGCGTACTTA   | GCCTGTTTCATCCTCAATGC     |
| <b>TNNI3</b>   | CCTCAAGCAGGTGAAGAAGG     | CAGTAGGCAGGAAGGCTCAG     |
| <b>TNNT2</b>   | AGCATCTATAACTTGGAGGCAGAG | TGGAGACTTTCTGCTTATCGTTG  |
| <b>MYH6</b>    | GATAGAGAGACTCCTGCGGC     | CCGTCTTCCCATTCTCGGTT     |
| <b>MYH7</b>    | TCGTGCCTGATGACAAACAGGAGT | ATACTCGGTCTCGGCAGTGACTTT |
| <b>KCNQ1</b>   | CGCCTGAACCGAGTAGAAGA     | TGAAGCATGTCCGTGATGAG     |
| <b>HCN1</b>    | CATGCCACCGCTTTAATCCAG    | ATTGTAGCCACCAGTTTCCGA    |
| <b>HNC2</b>    | AGAAGGGCATTGACTCCGAG     | TAGCGGATCAGGCGTGAGA      |
| <b>HCN4</b>    | TCTTCCTCATTGTGGAGACACGCA | TGAGGATCTTCGTGAAGCGGACAA |
| <b>KCNH2</b>   | CAACCTGGGCGACCAGATAG     | GGTGTTGGGAGAGACGTTGC     |
| <b>KCNJ8</b>   | GTGATTGCCGTCCGAAATGG     | AGTTGGTGAATAGGAACCACT    |
| <b>KCNJ2</b>   | CTTTGTAGTGCCAGAGACTTAG   | CACTGTCGTCTTCCTCTTTG     |
| <b>KCND2</b>   | CTACCTGTTCCGGTGATTGTATCC | TCTTTTGTGCCCTTCGTTTGT    |
| <b>SCN5A</b>   | TCTCTATGGCAATCCACCCCA    | GAGGACATACAAGGCGTTGGT    |
| <b>ATP2A2</b>  | CATCAAGCACACTGATCCCGT    | CCACTCCCATAGCTTTCCCAG    |
| <b>CACNA1C</b> | TGATTCCAACGCCACCAATTC    | GAGGAGTCCATAGGCGATTACT   |
| <b>CAMKIIβ</b> | GCACACCAGGCTACCTGTC      | CATACGCCTCTTTGCGAAGG     |
| <b>PLN</b>     | ACCTCACTCGCTCAGCTATAA    | CATCACGATGATACAGATCAGCA  |
| <b>TRDN</b>    | TCACAGAAGACATAGTGACGACG  | TGGCAATAGAGCTTGCTGAAA    |
| <b>RYR2</b>    | CATCGAACACTCCTCTACGGA    | GGACACGCTAACTAAGATGAGGT  |
| <b>JPH2</b>    | ACTCTGGCTCCTGGAACCTTG    | GCGCCCCCTTGGTCTCTATG     |
| <b>DDB1</b>    | TCAACGGCATGATAGGGCTG     | CGCTCGGTGTGAAAGGATCT     |
